# Supplementary material for: Wheat germ oil vitamin E cytoprotective effect and its nutrigenomics signature in human hepatocyte lipotoxicity
Source: PubMed Central journal article supplement — Heliyon. 2022 Sep 23;8(9):e10748. doi: 10.1016/j.heliyon.2022.e10748 (PMC9525900; doi:10.1016/j.heliyon.2022.e10748), 2022-09-23
Supplement: mmc1.pdf [file mmc1.pdf]

Supplementary materials

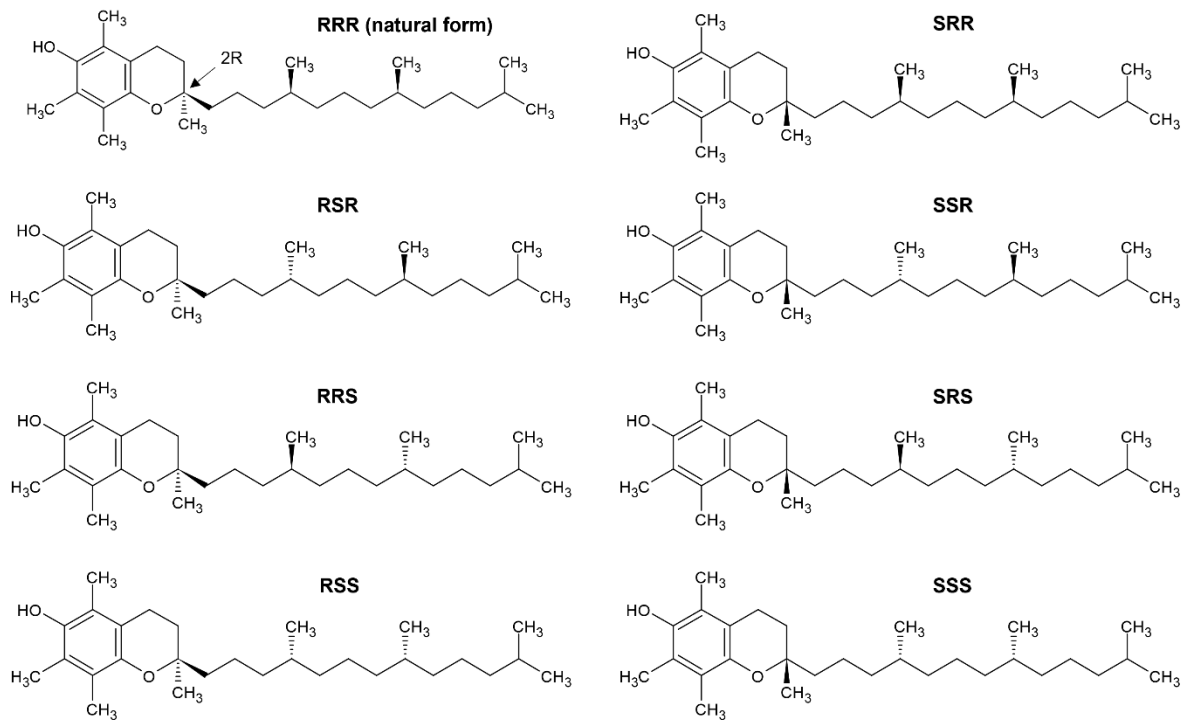

Suppl. Figure S1. Vitamin E stereoisomers of *all-rac*- $\alpha$ -tocopherol.

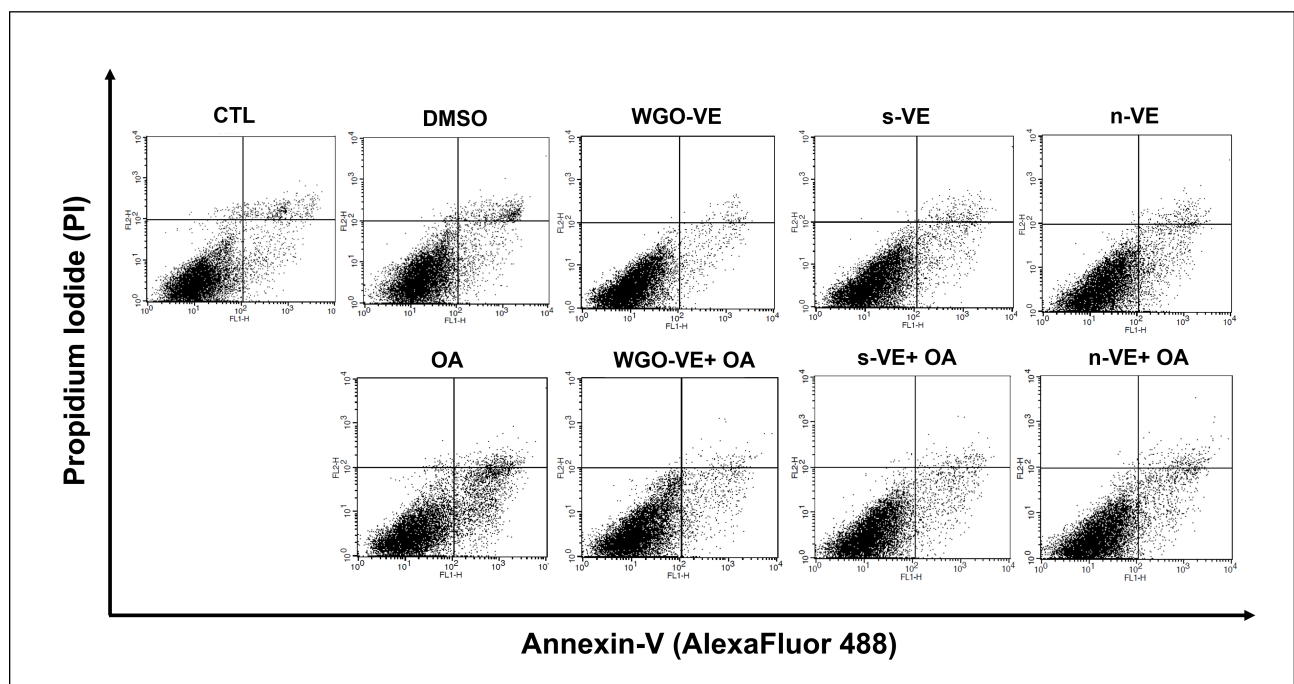

Supplementary Figure S2. Representative FACS analysis scatter plots with gating of apoptotic (Annexin-V positive) and necrotic cells (PI positive).

| Genes in common to all treatments (#31) | Genes in common between sVE and WGO-VE (#7) | Genes in common between sVE and nVE (#15) | Genes in common between nVE and WGO-VE (#48) | Genes exclusively modulated by sVE (#73) | Genes exclusively modulated by WGO-VE (#56) | Genes exclusively modulated by nVE (#179) |                   |          |
|-----------------------------------------|---------------------------------------------|-------------------------------------------|----------------------------------------------|------------------------------------------|---------------------------------------------|-------------------------------------------|-------------------|----------|
| AGAP2                                   | NR4A2                                       | ARRB2                                     | AURKB                                        | FXYD2                                    | ABCD1                                       | IL1RL2                                    | EZH2              | EGR3     |
| AKR1B10                                 | CAMKK2                                      | CCN2                                      | SERPINB2                                     | DSPP                                     | ADIPOQ                                      | MMP2                                      | PDCD1LG2          | CHI3L1   |
| AREG                                    | DUSP1                                       | CTPT                                      | NFE2                                         | PROX1                                    | ADRA1A                                      | TRAF2                                     | APOE              | CD300A   |
| ASIC1                                   | LCN2                                        | A2M                                       | TPX2                                         | BNIP3                                    | APOL6                                       | TPD52                                     | IL2               | FOXO1    |
| BDNF                                    | FABP5                                       | EGLN3                                     | GLIPIR1                                      | AIFM1                                    | ATP7B                                       | APCDD1                                    | APOH              | DUSP10   |
| CD14                                    | IRS2                                        | TREM2                                     | STC1                                         | PRKAA2                                   | BCR                                         | SFRP2                                     | ATP5F1A           | ITIH4    |
| CREB3L3                                 | FGFR4                                       | GHR                                       | IKBKG                                        | CXCL3                                    | BTX                                         | NUAK1                                     | PGGT1B            | TXNIP    |
| DAPK2                                   |                                             | IGFBP3                                    | GSN                                          | RG55                                     | C1QTNF3                                     | PPARGC1A                                  | PDX1              | TRAF1    |
| EREG                                    |                                             | LBP                                       | IRF1                                         | TP53                                     | CAVIN3                                      | MST1R                                     | FKBP5             | TRPC7    |
| FOXO4                                   |                                             | MAP15                                     | HMMR                                         | GDF15                                    | CCL23                                       | RNASE1                                    | PKFB3             | DTX1     |
| GPER1                                   |                                             | HTR3A                                     | CXCL13                                       | HMOX1                                    | CLEC12A                                     | SLFN11                                    | CDK1              | HLA-DQA1 |
| GZMB                                    |                                             | SOX2                                      | FGFR2                                        | FCGR2A                                   | CYP17A1                                     | SOCS2                                     | CLCN7             | PRKAA1   |
| HIPK1                                   |                                             | CPB2                                      | BCL2L11                                      | ZC3H12A                                  | DRD3                                        | IL13RA2                                   | POU2AF1           | IL6      |
| IGFBP1                                  |                                             | IQGAP2                                    | PCLAF                                        | CLUH                                     | F11                                         | E1F2AK2                                   | SPARC             | IL7      |
| IGFBP5                                  |                                             | GFAP                                      | TRPC5                                        | ERG                                      | F2                                          | IDO1                                      | PRMT1             | mir-221  |
| LIF                                     |                                             |                                           | MAP3K5                                       | PDK1                                     | FHIT                                        | FAF1                                      | PLAC8             | PTPN6    |
| LZT51                                   |                                             |                                           | SMO                                          | IL23A                                    | HINT2                                       | MMP28                                     | ACBD5             | AURKA    |
| MAP3K14                                 |                                             |                                           | UPP1                                         | AMBRA1                                   | HIVEP3                                      | MMP7                                      | ALB               | IL36B    |
| MMP13                                   |                                             |                                           | TMEM38A                                      | PDE1C                                    | IL12A                                       | BMF                                       | MGAT1             | CD70     |
| NDRG1                                   |                                             |                                           | SELL                                         | CCR2                                     | KCNH1                                       | HNF1A                                     | TNFSF10           | WEE1     |
| ODC1                                    |                                             |                                           | ITGB4                                        | AMOTL1                                   | KLF2                                        | FNDC4                                     | SAA2              | PNPLA2   |
| PK4                                     |                                             |                                           | DRAM1                                        | BLM                                      | KLHL22                                      | PRKCG                                     | CLCA2             | CXCL17   |
| PLIN2                                   |                                             |                                           | TLR5                                         | PLA2G4A                                  | MAP3K8                                      | FGL1                                      | SELPLG            | RRM1     |
| POSTN                                   |                                             |                                           | DPP4                                         | DRD2                                     | MBP                                         | RARA                                      | NPS               | HCLS1    |
| PPBP                                    |                                             |                                           | NT5E                                         | LAPTM5                                   | MEF2D                                       | PRPF4                                     | PPFIA4            | S100A9   |
| RASSF5                                  |                                             |                                           | CENPA                                        | EGLN1                                    | MFSD2A                                      | EGR2                                      | F3                | CSF2     |
| S100A4                                  |                                             |                                           | DNA2                                         | GRP                                      | MMP8                                        | IL1A                                      | MFNG              | S100G    |
| S1PR1                                   |                                             |                                           | ACTA2                                        | CRH                                      | MSH3                                        | MET                                       | RUFY4             | THBD     |
| STING1                                  |                                             |                                           | BCL2                                         | ADM                                      | MYC                                         | CENPE                                     | SERPING1          | KLKB1    |
| TNFRSF11B                               |                                             |                                           | RRM2                                         | UCN3                                     | NEDD9                                       | FERMT1                                    | MICOS10-NBL1/NBL1 | CXCR5    |
| VDR                                     |                                             |                                           | PIK3CD                                       | GLI1                                     | NLRP4                                       | PPARA                                     | KIF11             | SLC7A2   |
|                                         |                                             |                                           | HMGAI                                        | HCA2                                     | NOTCH1                                      | NOG                                       | YARS1             | HP       |
|                                         |                                             |                                           | B4GALT1                                      | PLEKHF1                                  | NR1I2                                       | BRCA2                                     | RALGDS            | XRCC2    |
|                                         |                                             |                                           | H2AX                                         | SUMF1                                    | ORMDL3                                      | MPO                                       | PEG10             |          |
|                                         |                                             |                                           | TGFB1                                        | TFEB                                     | P2RY1                                       | ZBTB16                                    | MLL11             |          |
|                                         |                                             |                                           | S100A8                                       | CD200R1                                  | PDCD4                                       | PKM                                       | NKX2-2            |          |
|                                         |                                             |                                           | THBS2                                        | CYP2E1                                   | PIK3C2B                                     | GPR37                                     | HPGD              |          |
|                                         |                                             |                                           | BUB1                                         | GALP                                     | PLG                                         | VIM                                       | APOL1             |          |
|                                         |                                             |                                           | DAPK1                                        | TAC1                                     | PLK1                                        | TIRAP                                     | DNMT3B            |          |
|                                         |                                             |                                           | KLRD1                                        | TRPC1                                    | PRKCQ                                       | MAOB                                      | MT-ND3            |          |
|                                         |                                             |                                           | LPAR2                                        | FANCM                                    | PSEN2                                       | FASN                                      | PDE5A             |          |
|                                         |                                             |                                           | ANGPT1                                       | FGA                                      | PSMB9                                       | SCNN1A                                    | TGFB1             |          |
|                                         |                                             |                                           | RIPK2                                        | ALDH3A1                                  | PYCARD                                      | BRCA1                                     | F7                |          |
|                                         |                                             |                                           | BUB1B                                        | RASD2                                    | RGN                                         | SHH                                       | NRSA2             |          |
|                                         |                                             |                                           | MAD2L1                                       | CLU                                      | RPS6KB1                                     | CD27                                      | IL18R1            |          |
|                                         |                                             |                                           | PGR                                          | PPP2R1A                                  | SORL1                                       | GPX7                                      | CSAR2             |          |
|                                         |                                             |                                           | FANCD2                                       | ERRF1                                    | STIM1                                       | SCD                                       | IRS1              |          |
|                                         |                                             |                                           | CDC48                                        | RAG2                                     | STK24                                       | GSTM1                                     | GA6               |          |
|                                         |                                             |                                           |                                              | SLC27A4                                  | THRB                                        | CSAR1                                     | SERPINA3          |          |
|                                         |                                             |                                           |                                              | PRKD1                                    | TNFRSF1B                                    | BBS12                                     | SLC14A1           |          |
|                                         |                                             |                                           |                                              | ATR                                      | TRIB3                                       | LRR1                                      | MFN2              |          |
|                                         |                                             |                                           |                                              | RAPGEF3                                  | TRIM28                                      | FPR2                                      | ASIC3             |          |
|                                         |                                             |                                           |                                              | NF2                                      | TRIM62                                      | RARRES2                                   | LHX2              |          |
|                                         |                                             |                                           |                                              | NRG1                                     | TRPC4                                       | BARD1                                     | CSF1R             |          |
|                                         |                                             |                                           |                                              | BCL2L13                                  | TSC2                                        | FYB1                                      | RNASEL            |          |
|                                         |                                             |                                           |                                              | SIK1/SIK1B                               | XPO1                                        | CA9                                       | BCL11B            |          |
|                                         |                                             |                                           |                                              | LRRK2                                    |                                             | NUDT1                                     | CTSV              |          |
|                                         |                                             |                                           |                                              | VIP                                      |                                             | GPR174                                    | CLDN2             |          |
|                                         |                                             |                                           |                                              | CCL28                                    |                                             | SUV39H1                                   | MMP10             |          |
|                                         |                                             |                                           |                                              | POU3F2                                   |                                             | PRKAB1                                    | BACH2             |          |
|                                         |                                             |                                           |                                              | LTF                                      |                                             | SCG2                                      | TSC22D3           |          |
|                                         |                                             |                                           |                                              | HDC                                      |                                             | BIRC5                                     | PPARGC1B          |          |
|                                         |                                             |                                           |                                              | MID2                                     |                                             | PLAT                                      | SNAI2             |          |
|                                         |                                             |                                           |                                              | KDM4B                                    |                                             | GNAS                                      | AKR1B1            |          |
|                                         |                                             |                                           |                                              | EPM2A                                    |                                             | TRIM27                                    | MCM8              |          |
|                                         |                                             |                                           |                                              | TRH                                      |                                             | ELP1                                      | CYTIP             |          |
|                                         |                                             |                                           |                                              | TRPC3                                    |                                             | RGCC                                      | FOLR1             |          |
|                                         |                                             |                                           |                                              | RUNX1                                    |                                             | IL1B                                      | AGT               |          |
|                                         |                                             |                                           |                                              | MTTP                                     |                                             | KDM2B                                     | PJVK              |          |
|                                         |                                             |                                           |                                              | IGF2BP1                                  |                                             | ACVR1C                                    | PBK               |          |
|                                         |                                             |                                           |                                              | SRC                                      |                                             | DOK1                                      | BCL2L2            |          |
|                                         |                                             |                                           |                                              | ANGPT2                                   |                                             | FOXO1                                     | NCAPG             |          |
|                                         |                                             |                                           |                                              | PTPRO                                    |                                             | SGCA                                      | TWIST1            |          |

**Suppl. Table S1. Complete list of genes modulated by the different forms of VE investigated in the study.**

The list corresponds to the Venn Diagram analysis shown in Figure 1D.
